# Supplementary material
Source: PubMed Central journal article supplement (PMC3067819)
Supplement: supp_31_5_1030__1.pdf [file supp_31_5_1030__1.pdf]

**Table S1.** Yeast strains

| Strain  | Genotype                                                                                                                                                                    |
|---------|-----------------------------------------------------------------------------------------------------------------------------------------------------------------------------|
| MJY3175 | <i>MATa ura3-1, leu2-3,112, his3-11, trp1-1 can1-100 ade2-1 ndc10-1 CES4-MYC12::URA3 [cir<sup>+</sup>, p5015]</i>                                                           |
| MJY3176 | <i>MATa ura3-1, leu2-3,112, his3-11, trp1-1 can1-100 ade2-1 ndc10-1 CES4-MYC12::URA 3 [cir<sup>+</sup>, pSG5]</i>                                                           |
| MJY3177 | <i>MATa ura3-1, leu2-3,112, his3-11, trp1-1 can1-100 ade2-1 CES4-MYC12::URA3 bar1Δ [cir<sup>+</sup>, p5015]</i>                                                             |
| MJY3178 | <i>MATa ura3-1, leu2-3,112, his3-11, trp1-1 can1-100 ade2-1 CES4-MYC12::URA3 bar1Δ [cir<sup>+</sup>, pSG5]</i>                                                              |
| MJY5693 | <i>MATa ura3-1, leu2-3,112, his3-11, trp1-1 can1-100 ade2-1 [cir<sup>+</sup>, p5015]</i>                                                                                    |
| MJY5684 | <i>MATa ura3-1, leu2-3,112, his3-11, trp1-1 can1-100 ade2-1 [cir<sup>+</sup>, pSG5]</i>                                                                                     |
| MJY3180 | <i>MATa ura3-1, leu2-3,112, his3-11, trp1-1 can1-100 ade2-1 CES4-MYC12::URA3 bar1Δ [cir<sup>0</sup>, pSG5]</i>                                                              |
| MJY5687 | <i>MATa ura3-1, leu2-3,112, his3-11, trp1-1 can1-100 ade2-1 [cir<sup>0</sup>, pSG5]</i>                                                                                     |
| MJY3215 | <i>MATa ura3-1, leu2-3,112, his3-11, trp1-1 can1-100 ade2-1 CES4-MYC12::URA3 rsc2Δ::KAN [cir<sup>+</sup>, p5015]</i>                                                        |
| MJY3218 | <i>MATa ura3-1, leu2-3,112, his3-11, trp1-1 can1-100 ade2-1 CES4-MYC12::URA3 rsc2Δ::KAN [cir<sup>+</sup>, pSG5]</i>                                                         |
| MJY3210 | <i>MATa ura3-1, leu2-3,112, his3-11, trp1-1 can1-100 ade2-1 CES4-MYC12::URA3 kip1Δ::HIS3 [cir<sup>+</sup>, pSG5]</i>                                                        |
| MJY3188 | <i>MATa ura3-1, leu2-3,112, his3-11, trp1-1 can1-100 ade2-1 CES4-MYC12::URA3 his3::STB::HIS3 P<sub>GAL</sub>-REP1,REP2::TRP1 [cir<sup>0</sup>]</i>                          |
| MJY3191 | <i>MATa ura3-1, leu2-3,112, his3-11, trp1-1 can1-100 ade2-1 bar1Δ CES4-MYC12::URA3 his3::STB-distal::HIS3 P<sub>GAL</sub>-REP1,REP2::TRP1 [cir<sup>0</sup>]</i>             |
| MJY3193 | <i>MATa ura3-1, leu2-3,112, his3-11, trp1-1 can1-100 ade2-1 bar1Δ CES4-Myc12::URA3 his3::STB-proximal::HIS3 P<sub>GAL</sub>-REP1,REP2::TRP1 [cir<sup>0</sup>]</i>           |
| MJY3181 | <i>MATa ura3-1, leu2-3,112, his3-11, trp1-1 can1-100 ade2-1 bar1Δ CES4-MYC12::URA3 [cir<sup>+</sup>, pSTB-distal]</i>                                                       |
| MJY3240 | <i>MATa ura3-1, leu2-3,112, his3-11, trp1-1 can1-100 ade2-1 bar1Δ CES4-MYC12::URA3 [cir<sup>+</sup>, pSTB-proximal]</i>                                                     |
| MJY3185 | <i>MATa MCD1-MYC13::KAN his3::STB::HIS3 P<sub>GAL</sub>-REP1,REP2::URA3 [cir<sup>0</sup>]</i>                                                                               |
| MJY3220 | <i>MATa ura3-1, leu2-3,112, his3-11, trp1-1 can1-100 ade2-1 bar1Δ CES4-MYC12::URA3 P<sub>GAL</sub>-REP1,REP2::URA3 [cir<sup>0</sup>, pSTB<sub>5.5</sub>]</i>                |
| MJY3222 | <i>MATa ura3-1, leu2-3,112, his3-11, trp1-1 can1-100 ade2-1 bar1Δ CES4-MYC12::URA3 P<sub>GAL</sub>-REP,REP2::URA3 [cir<sup>0</sup> pSTB<sub>5</sub>]</i>                    |
| MJY3224 | <i>MATa ura3-1, leu2-3,112, his3-11, trp1-1 can1-100 ade2-1 bar1Δ CES4-MYC12::URA3 P<sub>GAL</sub>-REP,REP2::URA3 [cir<sup>0</sup>, pSTB<sub>4</sub>]</i>                   |
| MJY3226 | <i>MATa ura3-1, leu2-3,112, his3-11, trp1-1 can1-100 ade2-1 bar1Δ CES4-MYC12::URA3 P<sub>GAL</sub>-REP,REP2::URA3 [cir<sup>0</sup>, pSTB<sub>3</sub>]</i>                   |
| MJY3197 | <i>MATa ura3-1, leu2-3,112, his3-11, trp1-1 can1-100 ade2-1 bar1Δ CES4-MYC12::URA3 his3::3 repeats proximal-STB::HIS3 P<sub>GAL</sub>-REP1,REP2::TRP1 [cir<sup>0</sup>]</i> |
| MJY3198 | <i>MATa ura3-1, leu2-3,112, his3-11, trp1-1 can1-100 ade2-1 bar1Δ CES4-MYC12::URA3 his3::4 repeats proximal-STB::HIS3 P<sub>GAL</sub>-REP1,REP2::TRP1 [cir<sup>0</sup>]</i> |

MJY3199 *MATa ura3-1, leu2-3,112, his3-11, trp1-1 can1-100 ade2-1 bar1Δ CES4-MYC12::URA3 his3::5.5 repeats proximal-STB::HIS3 P<sub>GAL</sub>-REP1,REP2::TRP1 [cir<sup>0</sup>]*

MJY5729 *MATa ura3-1, leu2-3,112, his3-11, trp1-1 can1-100 ade2-1 SCM3-MYC13::HIS3 [cir<sup>+</sup>]*

MJY5732 *MATa ura3-1, leu2-3,112, his3-11, trp1-1 can1-100 ade2-1 SCM3-MYC13::HIS3 [cir<sup>+</sup>, pSG5]*

MJY5733 *MATa ura3-1, leu2-3,112, his3-11, trp1-1 can1-100 ade2-1 SCM3-MYC13::HIS3 [cir<sup>+</sup>, p5015]*

MJY5776 *MATa ura3-1, leu2-3,112, his3-11, trp1-1 can1-100 ade2-1 bar1Δ CES4-MYC12::URA3 bar1Δ [cir<sup>+</sup>, pCH5]*

RC82<sup>1</sup> *MATa ura3-1, leu2-3,112, his3-11, trp1-1 can1-100 ade2-1 bar1Δ CES4-MYC12::URA3 P<sub>GAL</sub>-3HA-SCM3::KAN [cir<sup>+</sup>]*

---

All strains listed, except for the last two, were engineered in our laboratory for the purpose of this study. The RC100 and RC82 strains were provided by J. L. Gerton<sup>1</sup>. The various plasmids harbored by several of these strains are described under ‘Materials and Methods’.

1. **Camahort, R., B. Li, L. Florens, S. K. Swanson, M. P. Washburn, and J. L. Gerton.** 2007. Scm3 is essential to recruit the histone H3 variant Cse4 to centromeres and to maintain a functional kinetochore. *Mol Cell* **26**:853-65.

**Table S2.** Primers for analysis of micrococcal nuclease digested chromatin

---

|     | Sequence (5' to 3')                      |
|-----|------------------------------------------|
| C1  | GGTCACATGCTTATAATCAACTTTTTTAAA           |
| C2  | GGTTTTATGTTTCGGTAATCATAACAATAAAT         |
| C3  | AATCTGGCTTAATAAAGTCTATAATATATATCTCAT     |
| C4  | GATATGGACTTAGTCAAAAGAAATTTTCTTAA         |
| C5  | AATAGGCATTATAGATCAGTTCGAGT               |
| C6  | ATAGGTTAACTCTAAGAGGTGATACTTA             |
| C7  | ACAATCAAATATCAAACCTTAACTATTGACTTT        |
| C8  | AAAAGCTAGTACTGTTTTGCAGTAA                |
| C9  | TGACTTAGAACTATCTATCGGCAG                 |
| C10 | GTTGAGATAATATATATATATATATATACTCCAGGTACAG |
| a   | TGCTGCAAGGCGATTAAGTTGGGTAA               |
| a'  | AGCGTATTCGAATATCATTGAGAAGCTGCAGCG        |
| b   | GAGGAGATACAGCCTAATATCCGACAAAC            |
| b'  | TATGCTATTGAAGTGCAAGATGGAAACGCA           |
| c   | CGAAGCATCTGTGCTTCATTTTGTAGAACA           |
| c'  | GAACAAAAAAGAAGTATAGATTCTTTGTTG           |
| d   | AATGCATCCCGAGAGCGCTATTTTTCTAAC           |
| c'  | CAACGCAATTAATGTGAGTTACCTCACTCA           |

---

The primers listed here were used in PCR reactions for the analyses presented in Figure 6.

**Table S3.** Primers for chromatin immunoprecipitation (ChIP) walk across the chromosome locale of *STB* integration

---

|    | Sequence (5' to 3')            |
|----|--------------------------------|
| 1  | TTCTGAACGAGGCGCGCTTTCC         |
| 2  | GGAGTCCACGTTCTTTAATAGTGG       |
| 3  | CCAACGTCAAAGGGCGAAAAACCG       |
| 4  | GCAGCCTGAATGGCGAATGGCGC        |
| 5  | GCGCCATTCGCCATTCAGGCTGC        |
| 6  | GCGTCACATCGGATAATAATGATGGC     |
| 7  | GCCATCATTATTATCCGATGTGACGC     |
| 8  | GAAAATGAACCGGGGATGCGACGTGC     |
| 9  | TGCGTTTCCATCTTGCACTTCAATAGCATA |
| 10 | TGTAGAACAACAAAAGAAGTAT         |
| 11 | ATACTTCTTTTTTGTCTACA           |
| 12 | GTAAAGCCTGGGGTGCCTAATGAG       |
| 13 | CTCATTAGGCACCCCAGGCTTTAC       |
| 14 | GTTCTGGCCTTTTGCTGGCC           |
| 15 | ACGAGCATCACAAAATCGACGCTCA      |
| 16 | GGGTTGGACTCAAGACGATAG          |

---

These primers were employed in ChIP experiments depicted in Figure 9.

**S4. Primers not listed in Tables S2 and S3.** Several primers, not listed in Tables S2 and S3, were utilized for various plasmid constructions and for ChIP analyses displayed in Figures 4, 5 and 8. Their sequences will be made available upon request.
